# Supplementary material for: GAD-alum immunotherapy in type 1 diabetes expands bifunctional Th1/Th2 autoreactive CD4 T cells
Source: PubMed Central journal article supplement (PMC7228993; doi:10.1007/s00125-020-05130-7), 2020-04-04
Supplement: 125_2020_5130_MOESM1_ESM.pdf [file 125_2020_5130_MOESM1_ESM.pdf]

**ESM Table 1. Comparison of participant characteristics in our mechanistic study and the original TrialNet intervention study, TN08.**

|                                  | <b>Mechanistic Sub-study (n=46)</b> |                |                | <b>Complete TrialNet Study (n=145)</b> |                |                |
|----------------------------------|-------------------------------------|----------------|----------------|----------------------------------------|----------------|----------------|
|                                  | Alum                                | GAD-Alum<br>x2 | GAD-Alum<br>x3 | Alum                                   | GAD-Alum<br>x2 | GAD-Alum<br>x3 |
| Age (years):                     |                                     |                |                |                                        |                |                |
| Mean (SD)                        | 16.2 (9.5)                          | 16.9 (10.5)    | 19 (10.6)      | 16.6 (9.23)                            | 14.9 (8.72)    | 17.9 (10.4)    |
| Median                           | 12 (8-42)                           | 14 (4-45)      | 16 (6-42)      | 14.5 (4-45)                            | 14.0 (3-45)    | 15.5 (3-44)    |
| Female sex                       | 4 (31%)                             | 10 (59%)       | 6 (38%)        | 19 (40%)                               | 31 (63%)       | 14 (29%)       |
| White race*                      | 12 (92%)                            | 15 (88%)       | 15 (94%)       | 40 (85%)                               | 45 (94%)       | 43 (91%)       |
| Non-Hispanic ethnic origin       | 11 (85%)                            | 16 (94%)       | 14 (88%)       | 48 (100%)                              | 49 (100%)      | 48 (100%)      |
| Autoantibodies:                  |                                     |                |                |                                        |                |                |
| 1                                | 1 (8%)                              | 0              | 1 (6%)         | 1 (2%)                                 | 0              | 3 (6%)         |
| 2                                | 1 (8%)                              | 2 (12%)        | 4 (25%)        | 10 (21%)                               | 10 (20%)       | 10 (21%)       |
| 3                                | 8 (62%)                             | 10 (59%)       | 6 (38%)        | 24 (50%)                               | 23 (47%)       | 14 (29%)       |
| 4                                | 3 (23%)                             | 5 (29%)        | 5 (31%)        | 13 (27%)                               | 16 (33%)       | 21 (44%)       |
| GADA titre (index units)         | 0.451 (0.337)                       | 0.492 (0.408)  | 0.140 (0.134)  | 0.336 (0.307)                          | 0.349 (0.381)  | 0.230 (0.224)  |
| Diabetes-associated HLA present* |                                     |                |                |                                        |                |                |
| DR3 & DR4                        | 4 (31%)                             | 5 (29%)        | 4 (25%)        | 14 (30%)                               | 7 (14%)        | 13 (27%)       |
| DR3 only                         | 3 (23%)                             | 4 (24%)        | 2 (12.5%)      | 8 (17%)                                | 13 (27%)       | 15 (31%)       |
| DR4 only                         | 4 (31%)                             | 8 (47%)        | 8 (50%)        | 20 (43%)                               | 21 (43%)       | 13 (27%)       |
| Neither                          | 2 (15%)                             | 0              | 2 (12.5%)      | 5 (11%)                                | 8 (16%)        | 7 (15%)        |

\*Descriptive statistics excludes some subjects (2 – race not reported)

**ESM Table 2. Characteristics of non-trial subjects with type 1 diabetes included in the mechanistic study.**

|                                    | T1D patients (n=71) |
|------------------------------------|---------------------|
| Age (years):                       |                     |
| Mean (SD)                          | 28.7 (6.78)         |
| Median                             | 29 (18-46)          |
| Female sex                         | 24 (34%)            |
| Mean Duration of diabetes (months) | 6 (0.25-14.5)       |
| Diabetes-associated HLA present*:  |                     |
| DR3 & DR4                          | 18 (26%)            |
| DR3 only                           | 10 (15%)            |
| DR4 only                           | 34 (50%)            |
| Neither                            | 6 (9%)              |

\*Descriptive statistics excludes some subjects (3: HLA alleles not tested)

**ESM Table 3: Oligos used for 1<sup>st</sup> PCR and qPCR**

| <b>Oligo name</b>         | <b>Sequence</b>       |
|---------------------------|-----------------------|
| <b>1<sup>st</sup> PCR</b> |                       |
| INFg-1_3'                 | TGGATGCTCTGGTCATCTTT  |
| INFg-1_5'                 | CTGTACTGCCAGGACCCAT   |
| IL4_1_3'                  | CTCTGGTTGGCTTCCTCAC   |
| IL4_1-5'                  | TGCCTCCAAGAACAACAAGT  |
| IL-13-1_3'                | TTTACAAACTGGGCCACCTC  |
| IL-13-1_5'                | GGTCAACATCACCCAGAACC  |
| T-bet_1-3'                | ATCTCCCCAAGGAATTGAC   |
| T-bet_2-5'                | CCGTGACTGCCTACCAGAAT  |
| GATA3_1-3'                | TTGGAGAAGGGGCTGAGAT   |
| GATA3_1-5'                | CCGCCCTACTACGGAAACTC  |
| SRP14_3'                  | GCTGCTGCTTTGGTCTTCTT  |
| SRP14_5'                  | TATGACGGTTCGAACCAAACC |
| <b>qPCR</b>               |                       |
| INFg-1_3'                 | TGGATGCTCTGGTCATCTTT  |
| INFg-2_5'                 | GGTCATTAGATGTAGCGGA   |
| IL4_1_3'                  | CTCTGGTTGGCTTCCTCAC   |
| IL4_2-5'                  | GGCAGTTCTACAGCCACCAT  |
| IL-13-1_3'                | TTTACAAACTGGGCCACCTC  |
| IL-13_2_5'                | GTAAGTGTGCAGCCCTGGAAT |
| T-bet_1-3'                | ATCTCCCCAAGGAATTGAC   |
| T-bet_2-5'                | CCGTGACTGCCTACCAGAAT  |
| GATA3_1-3'                | TTGGAGAAGGGGCTGAGAT   |
| GATA3_1-5'                | CCGCCCTACTACGGAAACTC  |
| SRP14_3'                  | GCTGCTGCTTTGGTCTTCTT  |
| SRP14_5'-2                | TACTGTGGAGGGCTTTGAGC  |

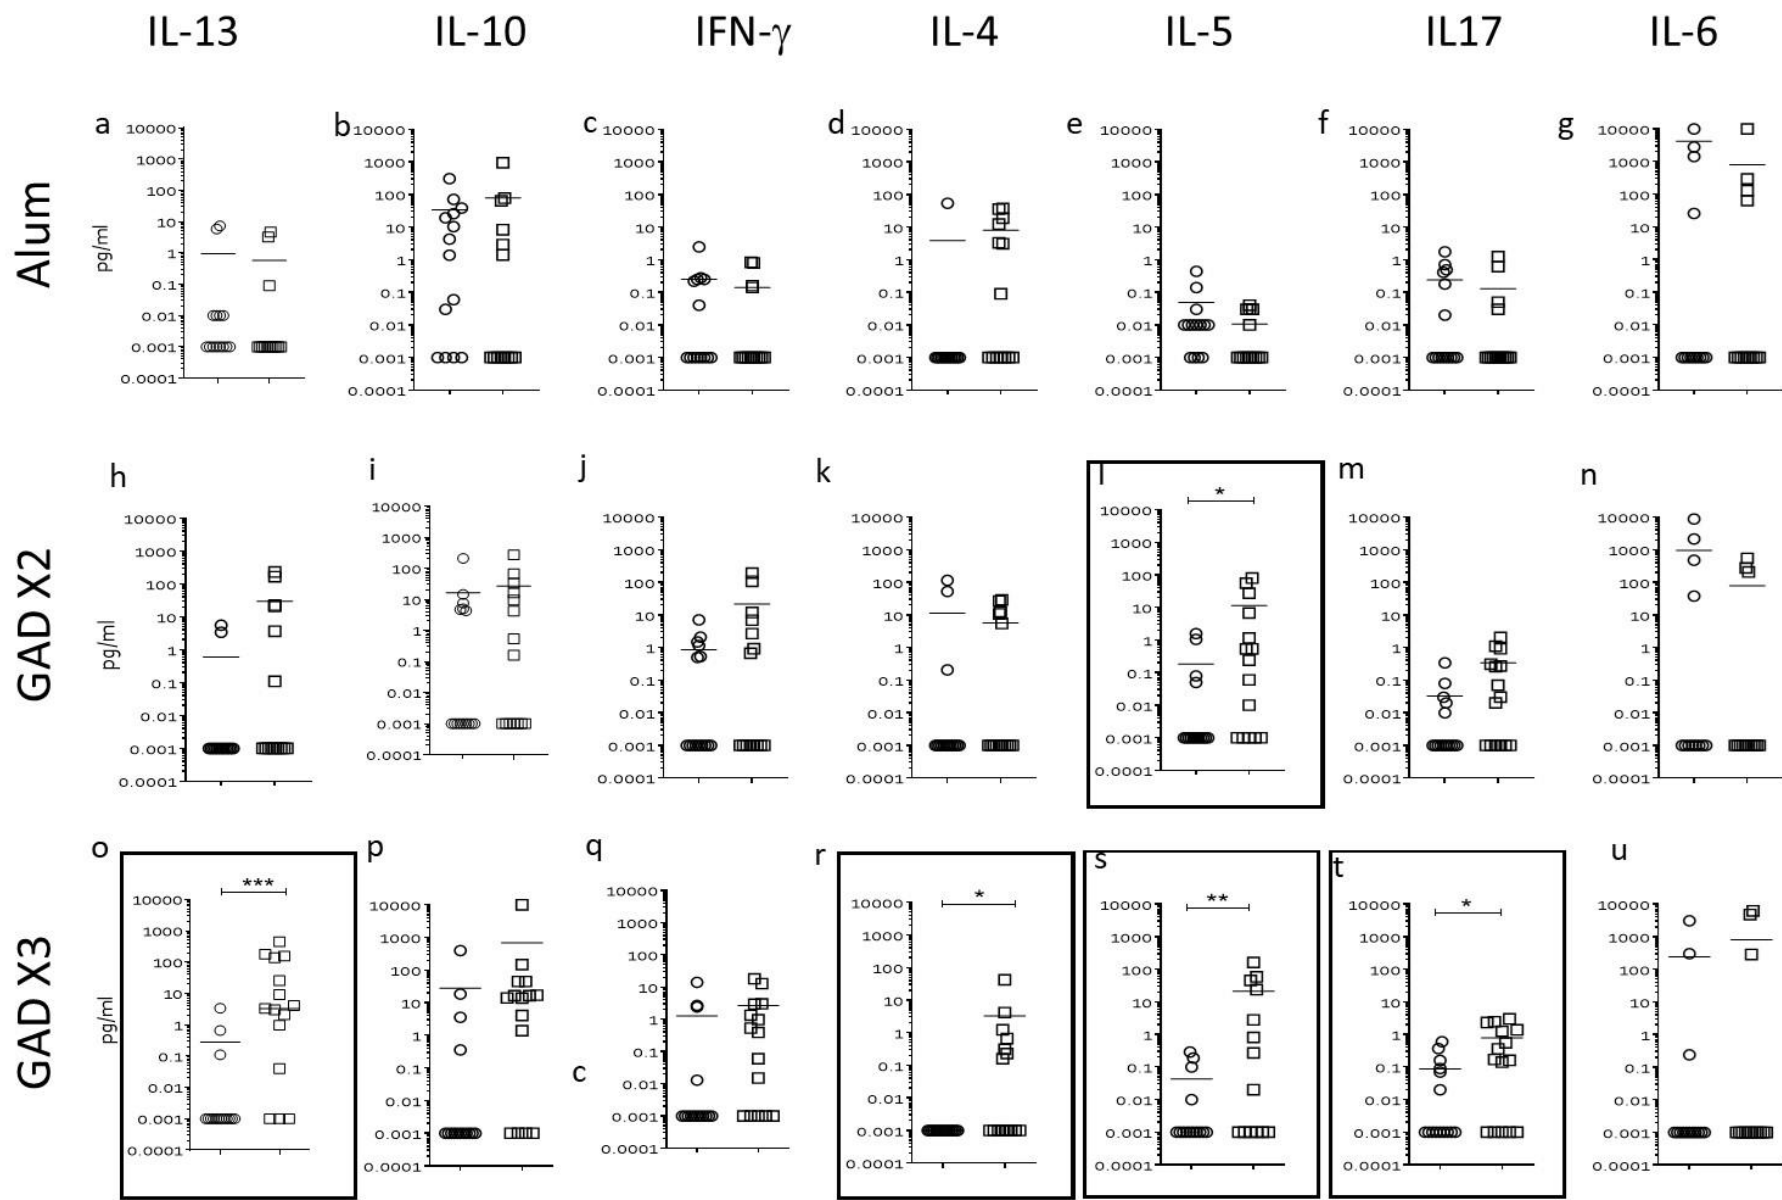

ESM Fig 1.: Th2 cytokines dominate T cell responses detected *in vitro* in response to stimulation with GAD65 in GAD-Alum treated patients. GAD-specific cytokine responses (log<sub>10</sub>) are shown at baseline (circles) and at day 91 (squares) for all treatment groups. Panels highlighted in black indicate significant changes upon vaccination compared to baseline samples (\*p<0.05, \*\* p<0.01, \*\*\*p<0.001).

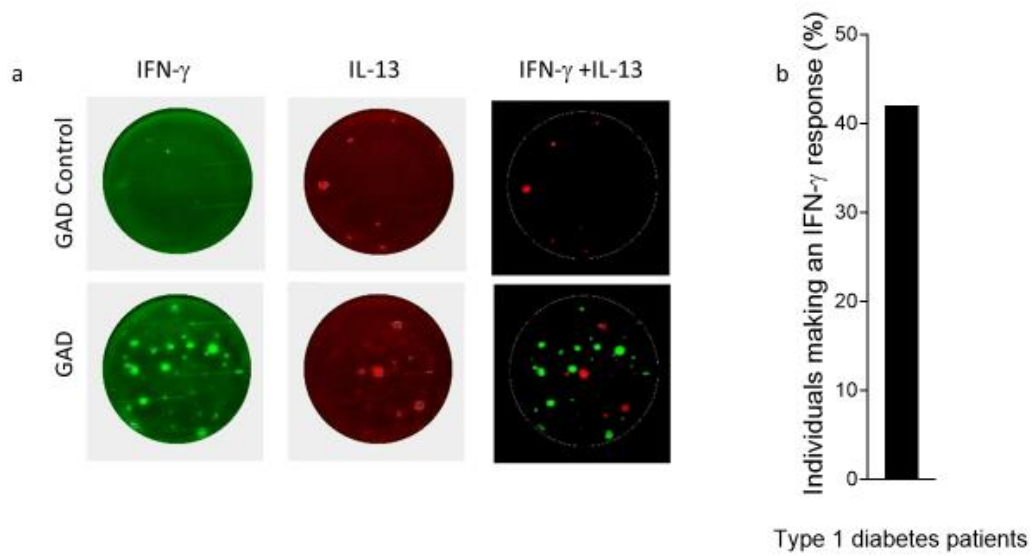

ESM Fig 2: IFN- $\gamma$  and IL13 responses to GAD65 antigen (or antigen control) in non-TN08 patients with recent-onset type 1 diabetes. Panel (a) shows the dual-colour fluorospot response of a representative patient in which both IFN- $\gamma$  (green spots) and IL-13 (red) responses can be detected in spontaneous disease and in the absence of GAD-Alum immunization. Of note, in the merged image there are no IFN- $\gamma$ +IL-13+ dual-expressing cells, which would appear yellow. Overall, (b) after testing 74 non-trial patients with recent-onset type 1 diabetes, the prevalence of spontaneous IFN- $\gamma$  responses to GAD65 is 42%.

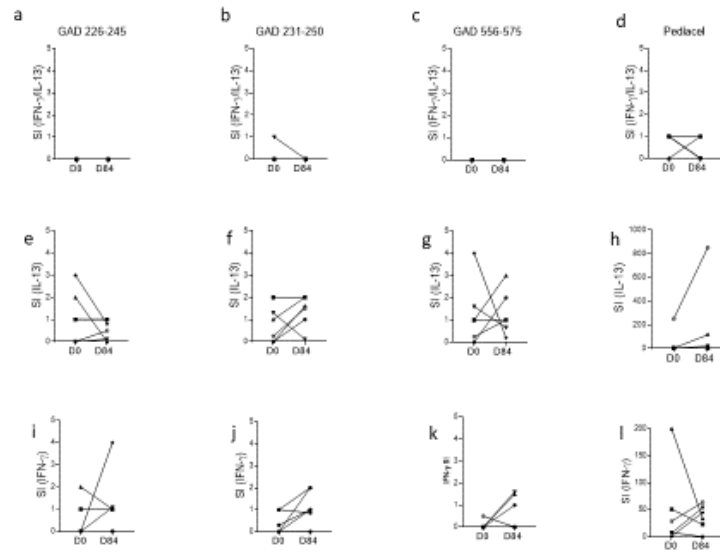

ESM Fig 3: IFN- $\gamma$  and IL-13 responses to GAD epitopes and Pediacel were analysed in 6 participants immunised with Alum at baseline and at day 84; bi-functional Th1/Th2 responses are shown in the top panel, single IL-13 in the middle panel and IFN- $\gamma$  responses in the bottom panel. Each symbol represents a different immunized subject.

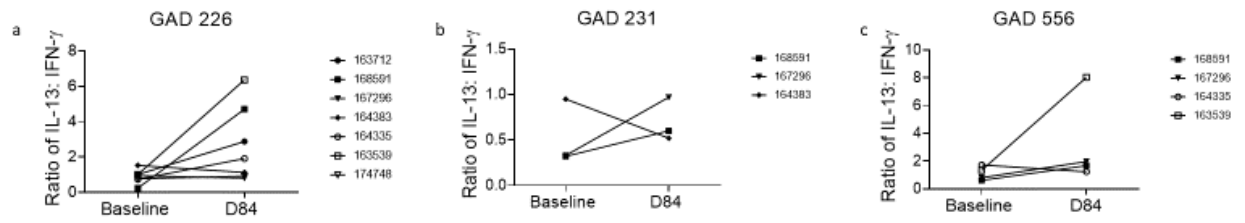

EMS Fig 4: GAD-specific bi-functional cells are induced upon GAD-Alum immunization. The ratio of IL13 to IFN- $\gamma$  responses in baseline and D84 post-treatment samples.

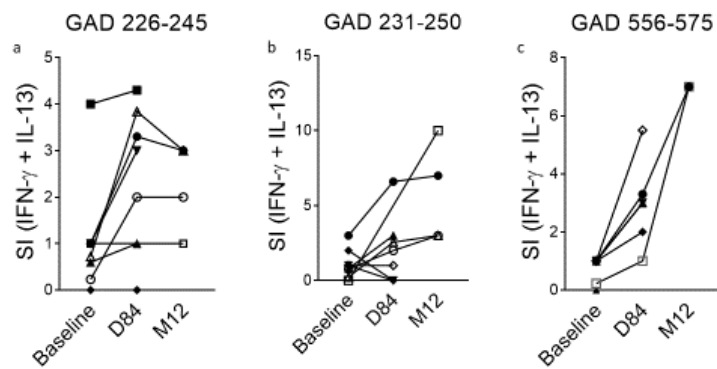

ESM Fig 5Bi-functional Th1/Th2 responses are stable for up to 12 months. Responses were analysed in 4 patients 12 months post-immunisation with GAD-Alum; Each symbol represents a different immunized subject.
